# Supplementary material
Source: PubMed Central journal article supplement (PMC4479400)

Figure S1A

Peptide 7: DTPVLPHETRLLQTGIHVRV

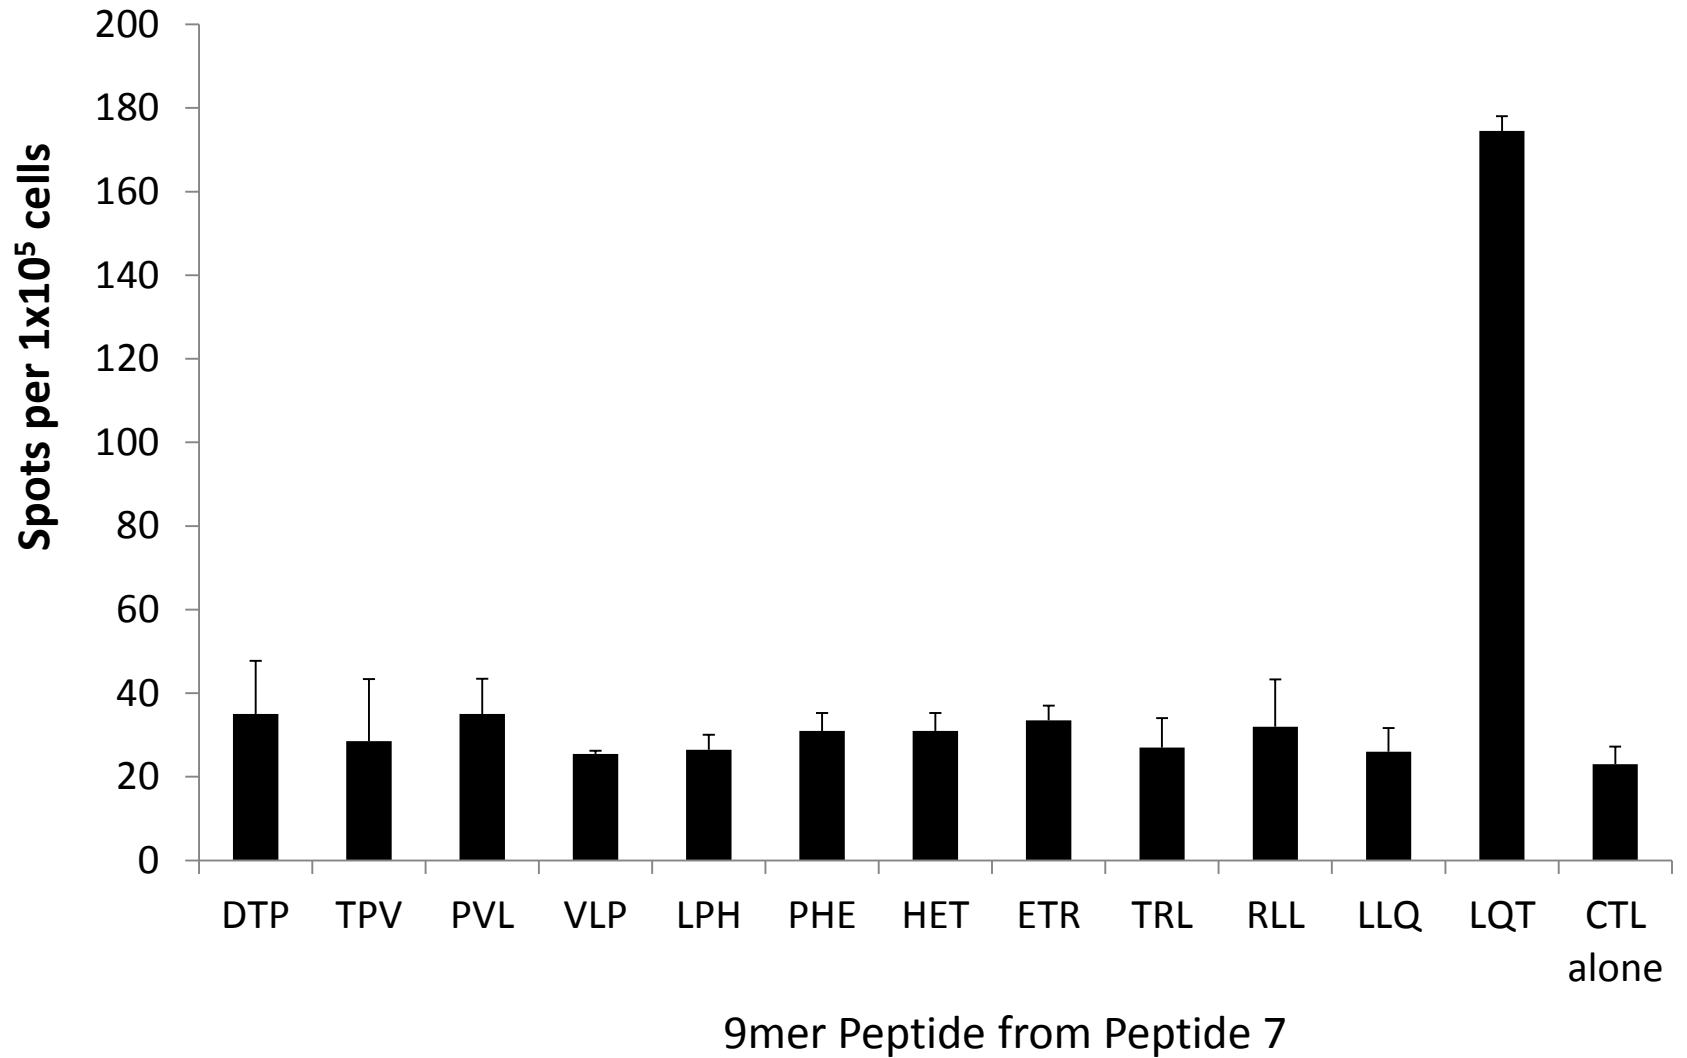

Figure S1B

Peptide 104: DANDIYRIFAELEGVWQPAA

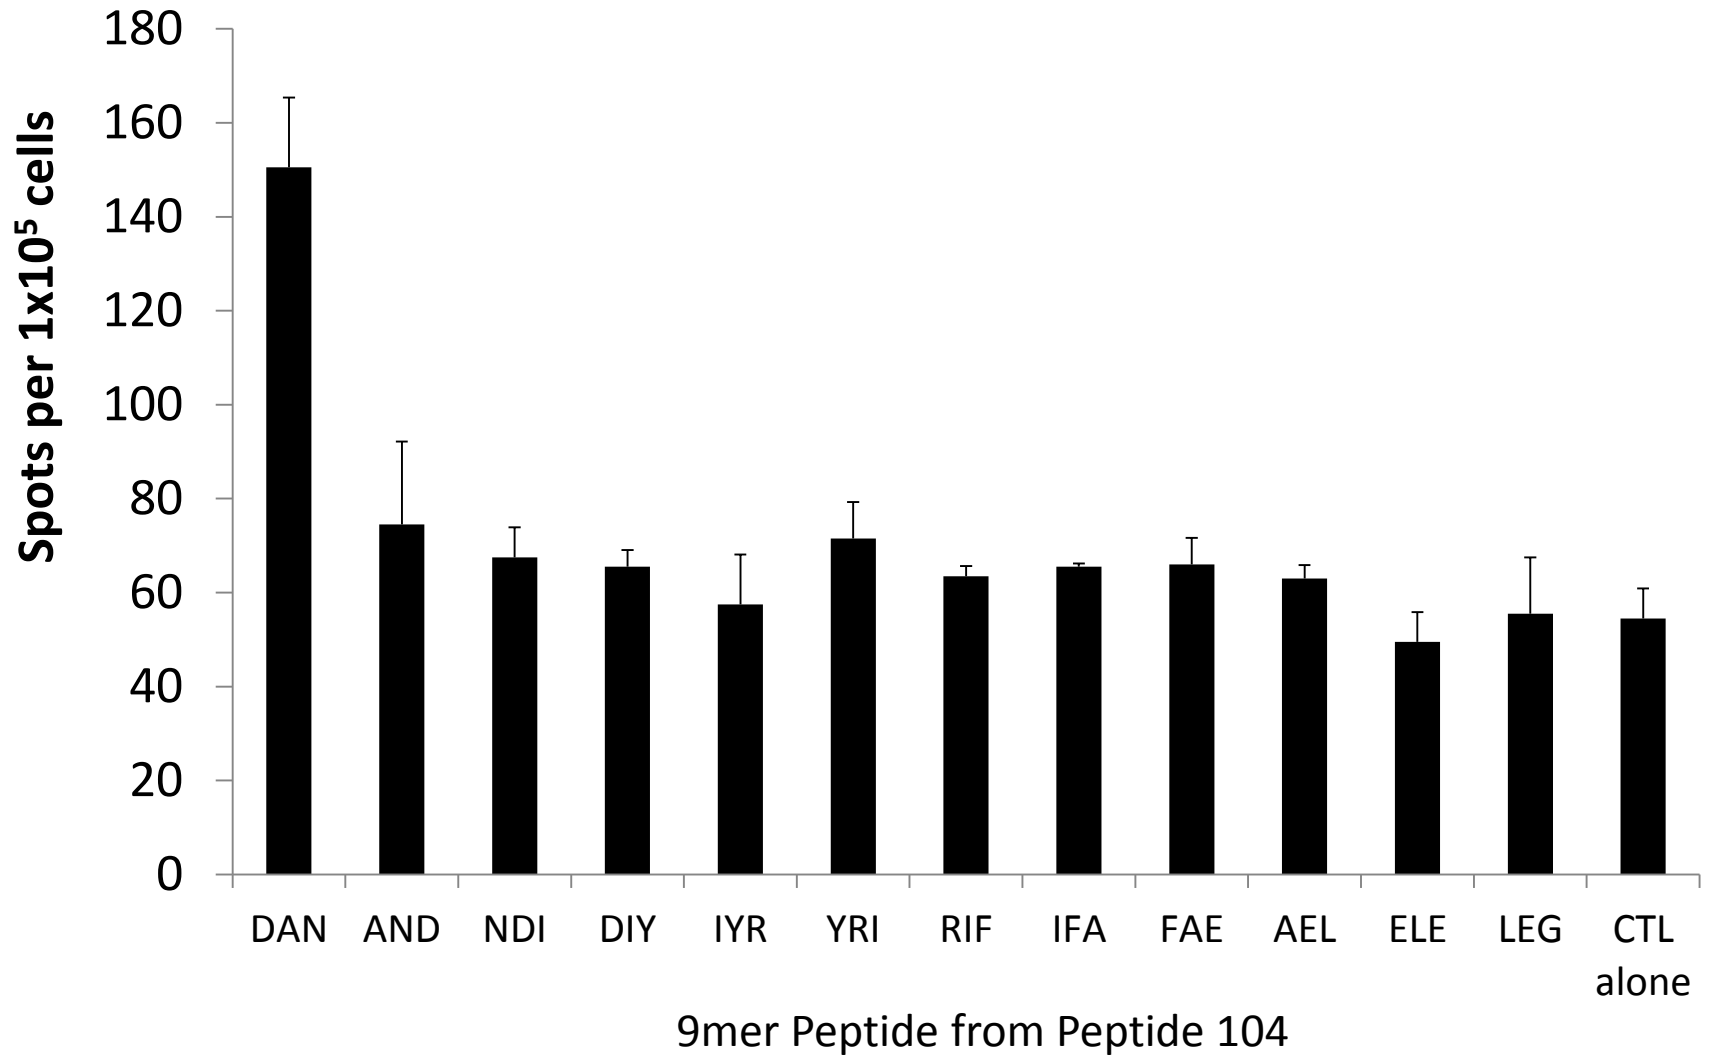

**Figure S1A,B. Identifying Atypical epitopes from CMVpp65.** To determine the minimal epitope, T-cells specific for the peptide DTPVLPHETRLLQTGIHVRV (S1A) and DANDIYRIFAELEGVWQPAA (S1B) were divided into 9 amino acid peptides spanning the entire 20mer and used to stimulate T-cells in an IFN- $\gamma$  ELISPOT assay. Error bars indicate standard deviation from the mean.

S2A

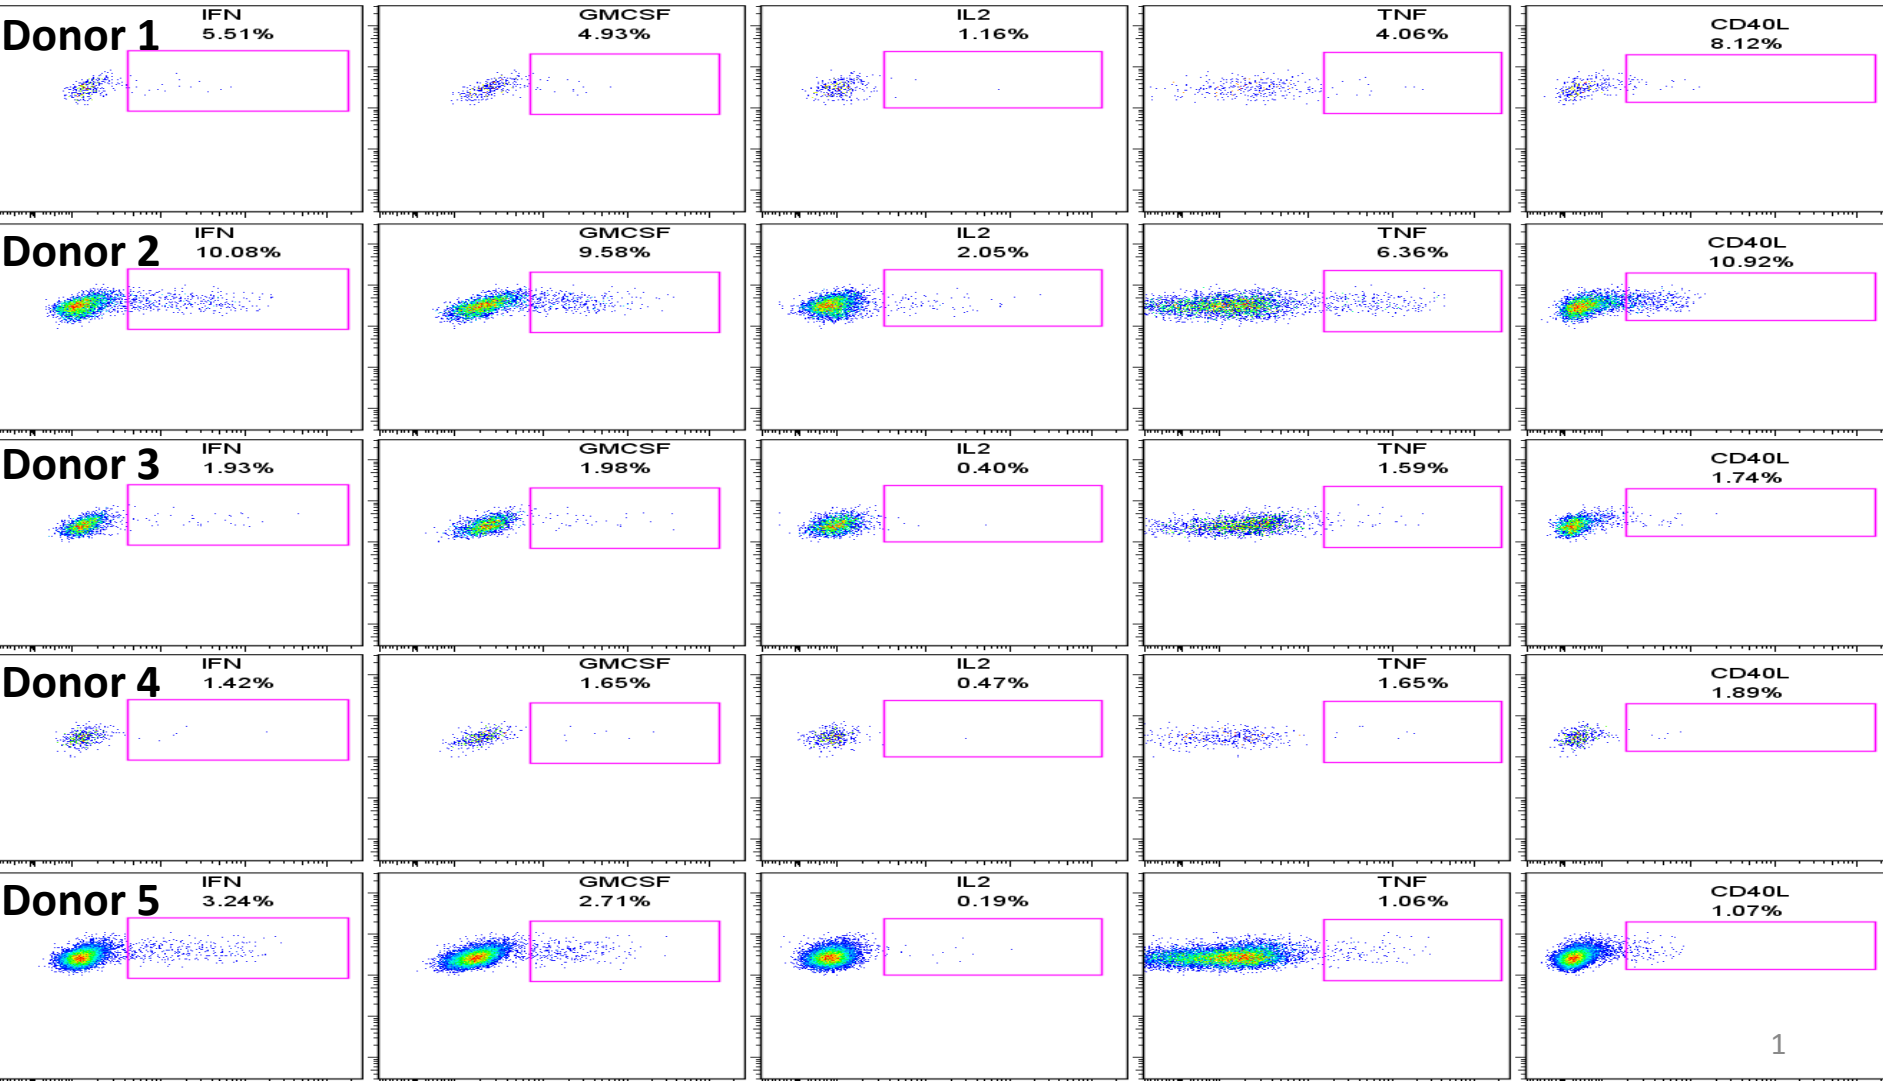



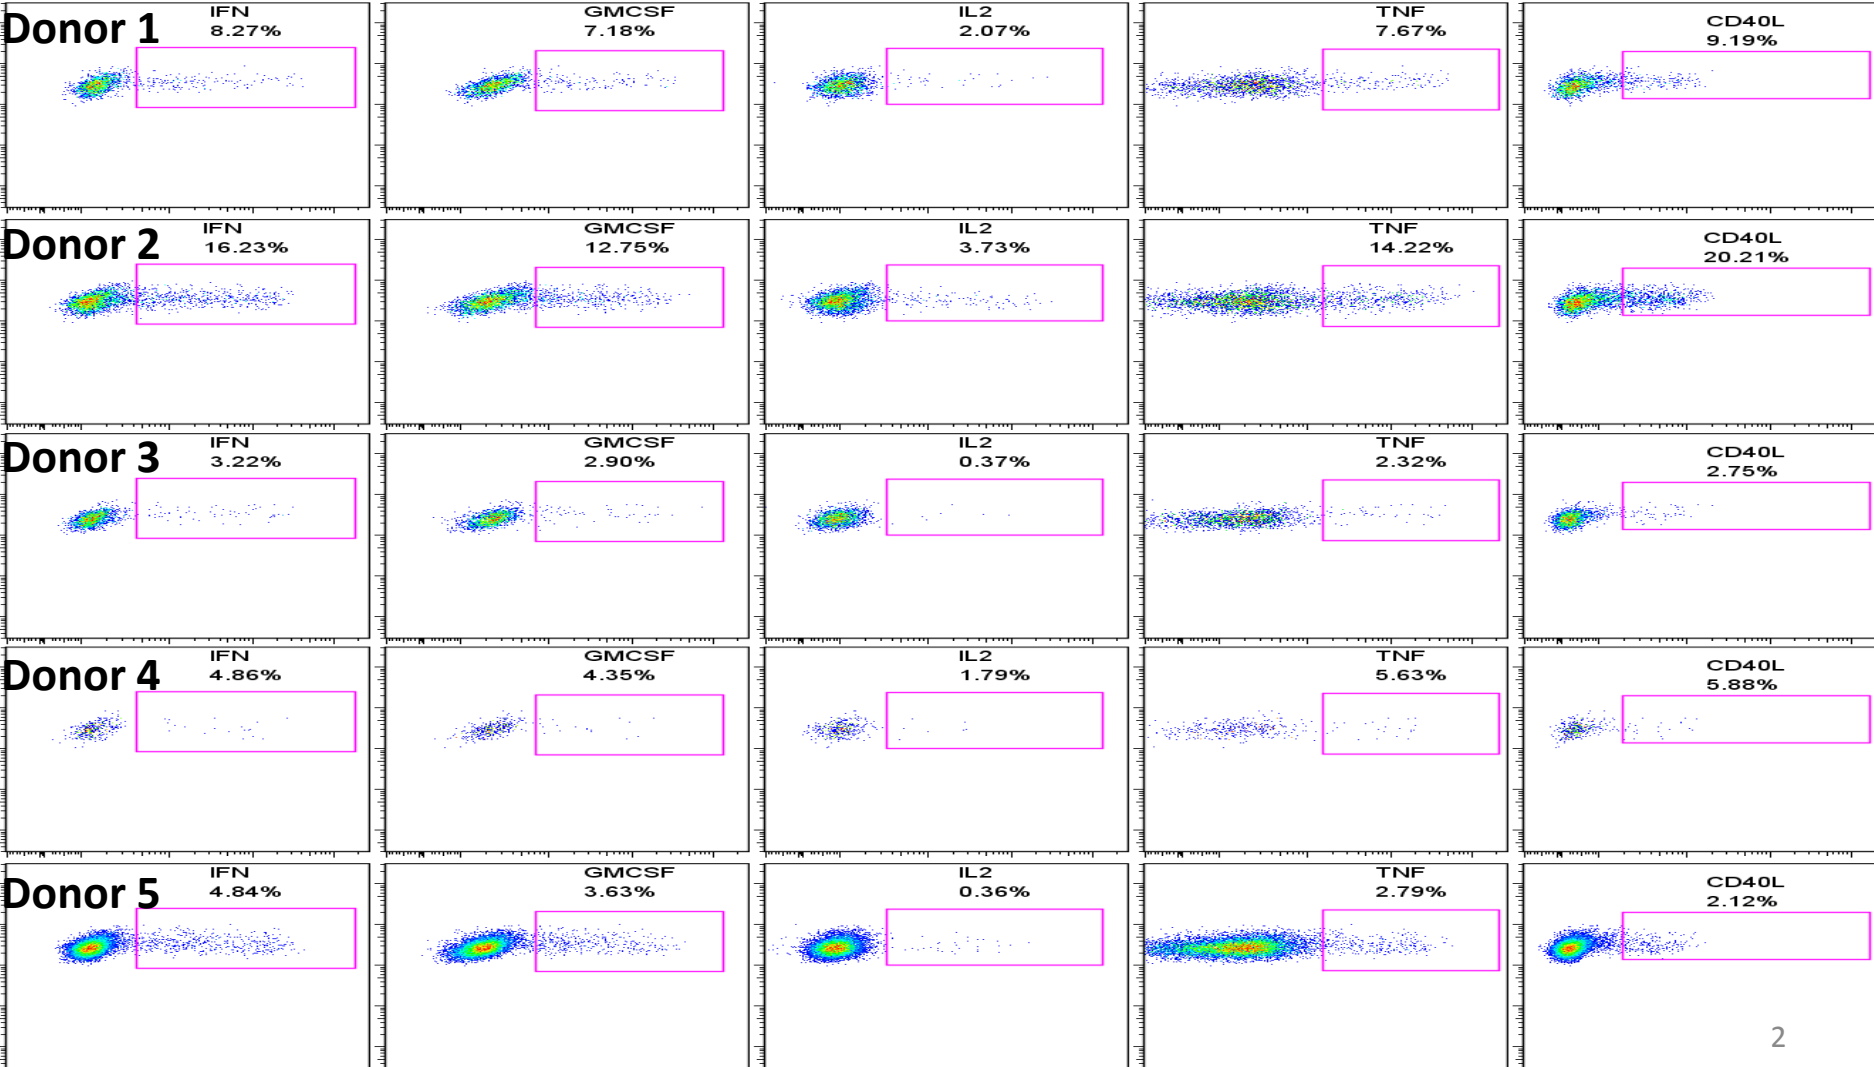

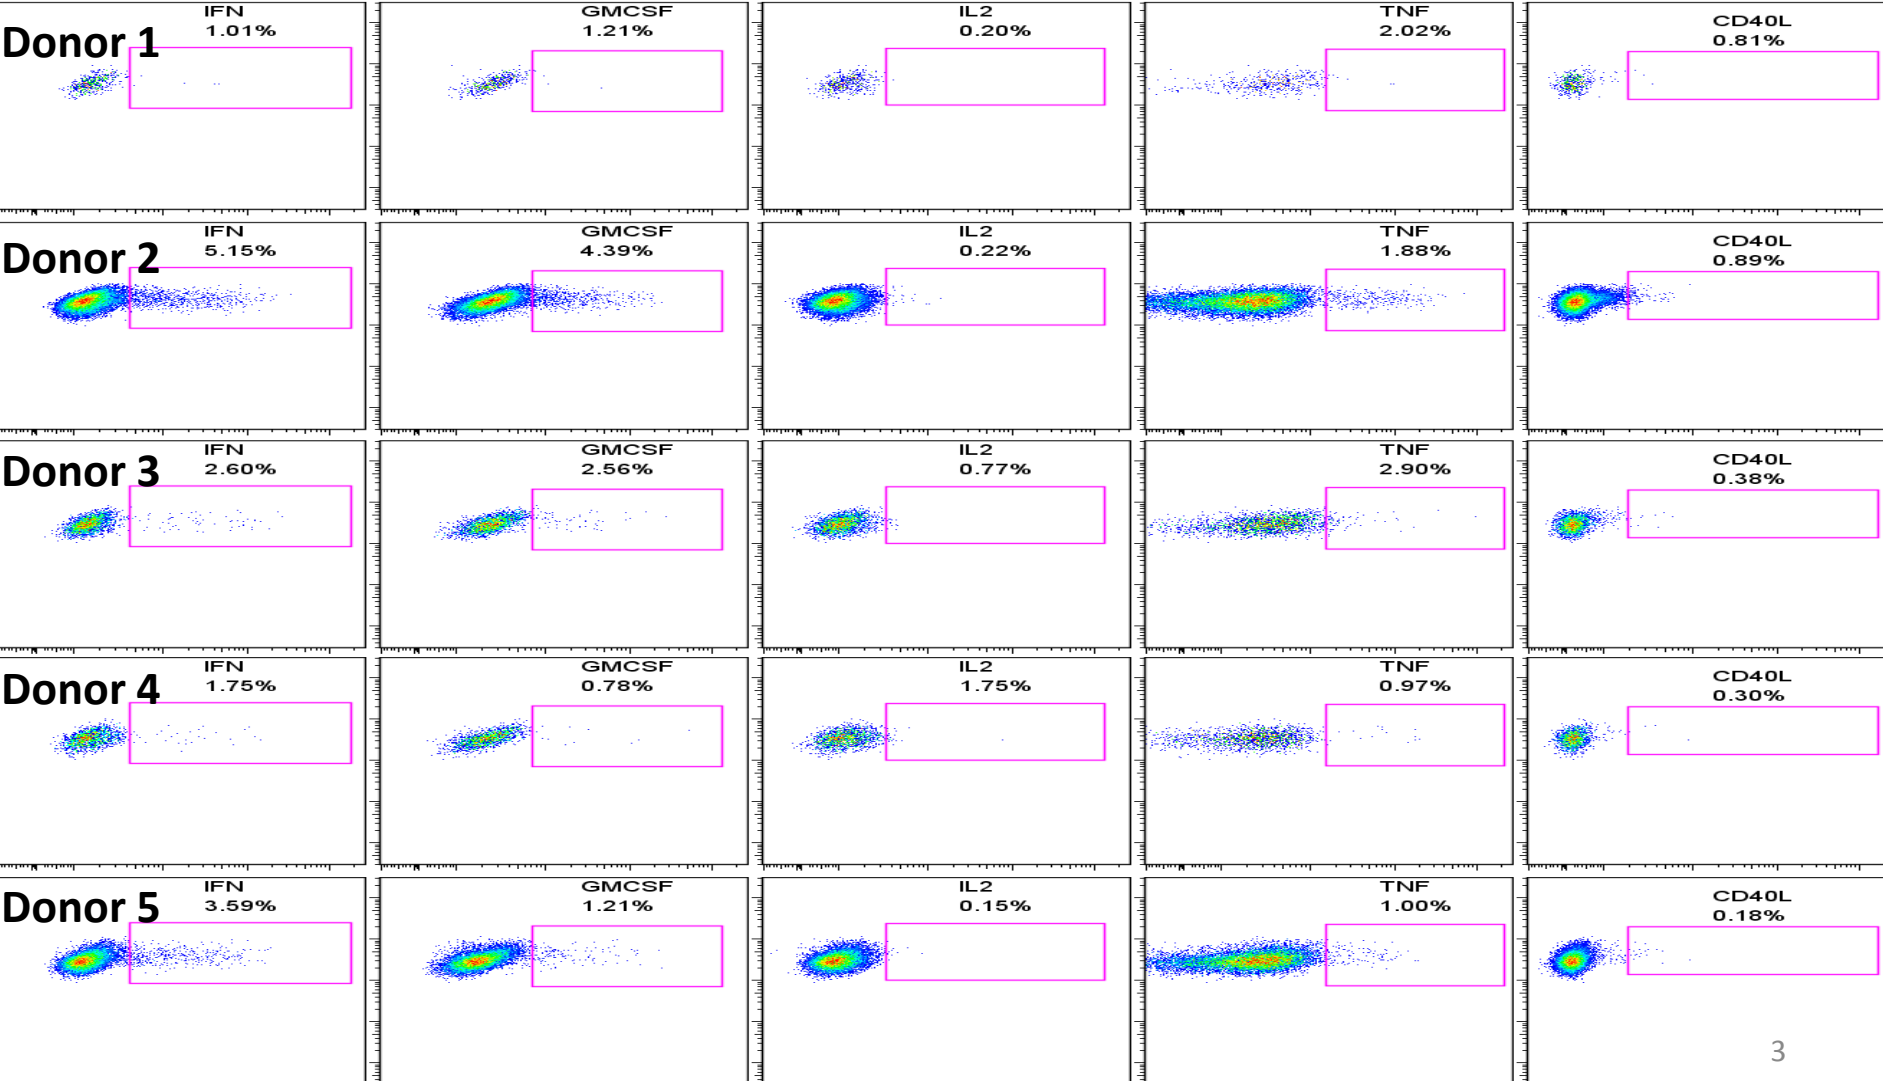

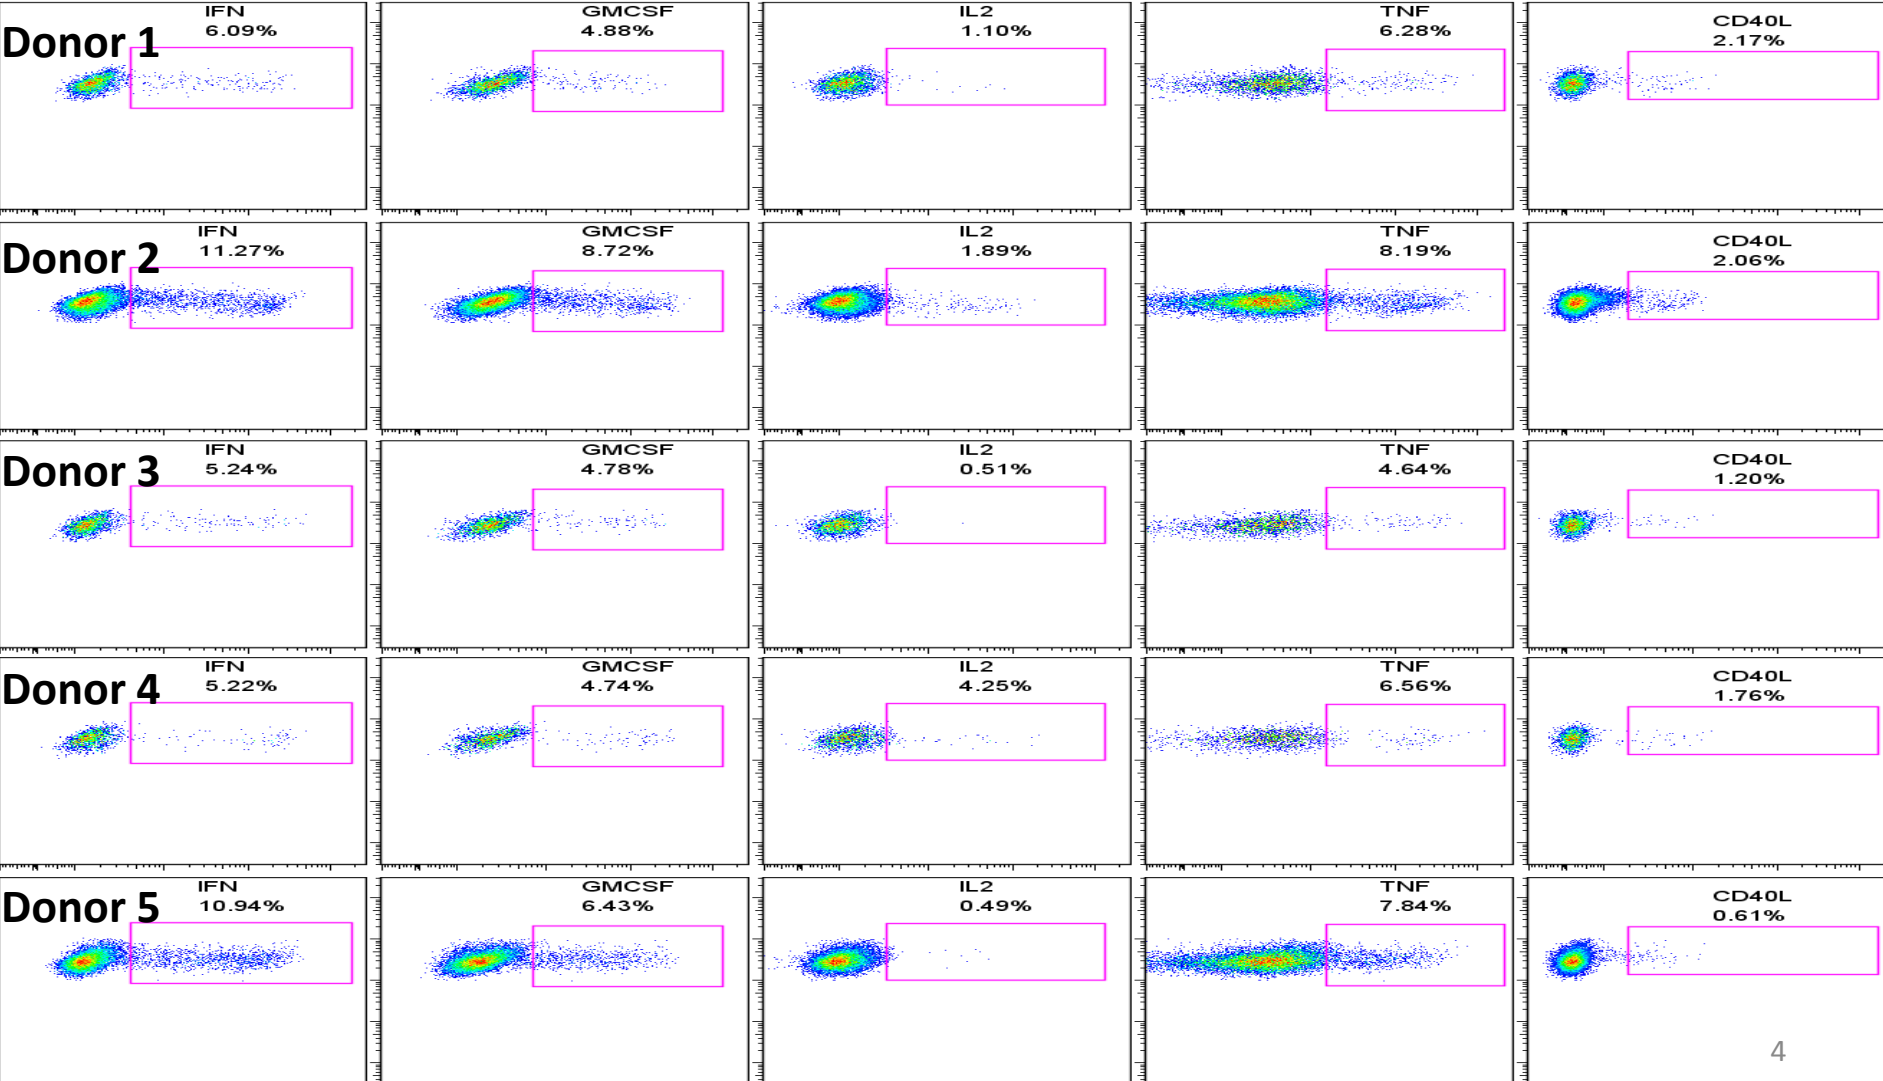

**Figure S2. Polyfunctionality of pp65-specific T cells derived from naïve T-cells.** Shown are five CMVpp65-specific T cell lines expanded from naïve donors. Lines were stimulated with CMVpp65 Pepmix for 6 hours and stained for IFN- $\gamma$ , GM-CSF, IL-2, TNF- $\alpha$ , and CD40L in the presence of Brefeldin A. A) Unstimulated CD4<sup>+</sup> T cells B) CD4<sup>+</sup> T cells stimulated for 6 hours with CMVpp65, C) Unstimulated CD8<sup>+</sup> T cells, D) CD8<sup>+</sup> T cells stimulated for 6 hours with CMVpp65.

# Supplementary Figure 3

## A

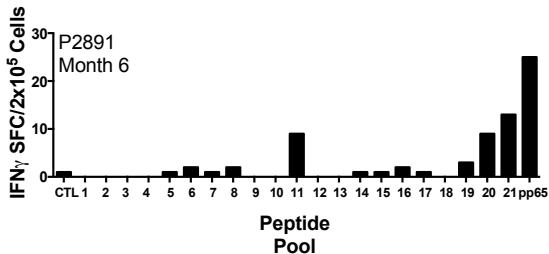

## B

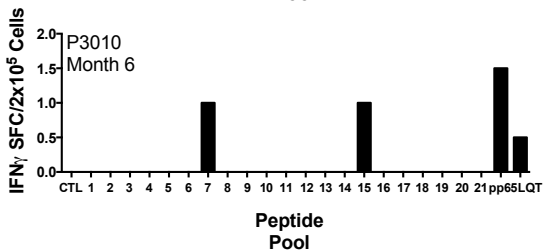

## C

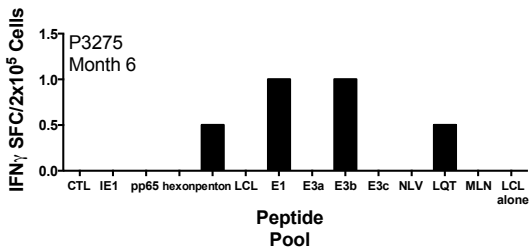

**Figure S3. Atypical epitope recognition in patient receiving cord blood-derived virus-specific T- cells.** Shown is the virus-specific response from patient P3010, an HLA-A2+ cord blood transplant recipient who received CB-derived virus-specific T-cells. S3A) After two stimulations the expanded CB T-cells were tested for specificity in an IFN- $\gamma$  ELISPOT assay. Error bars indicate standard deviation from the mean. S3B) One year post-T-cell infusion, peripheral blood mononuclear cells were isolated from the recipient and expanded using EBV-LCL transduced with the Ad5f35pp65 vector in the presence of IL-4 and IL-7. After one week the expanded cells were tested for activity against CMV, EBV, and adenovirus, as well as the CMVpp65 epitopes MLN and NLV. Data represent one well.

**Figure S4**

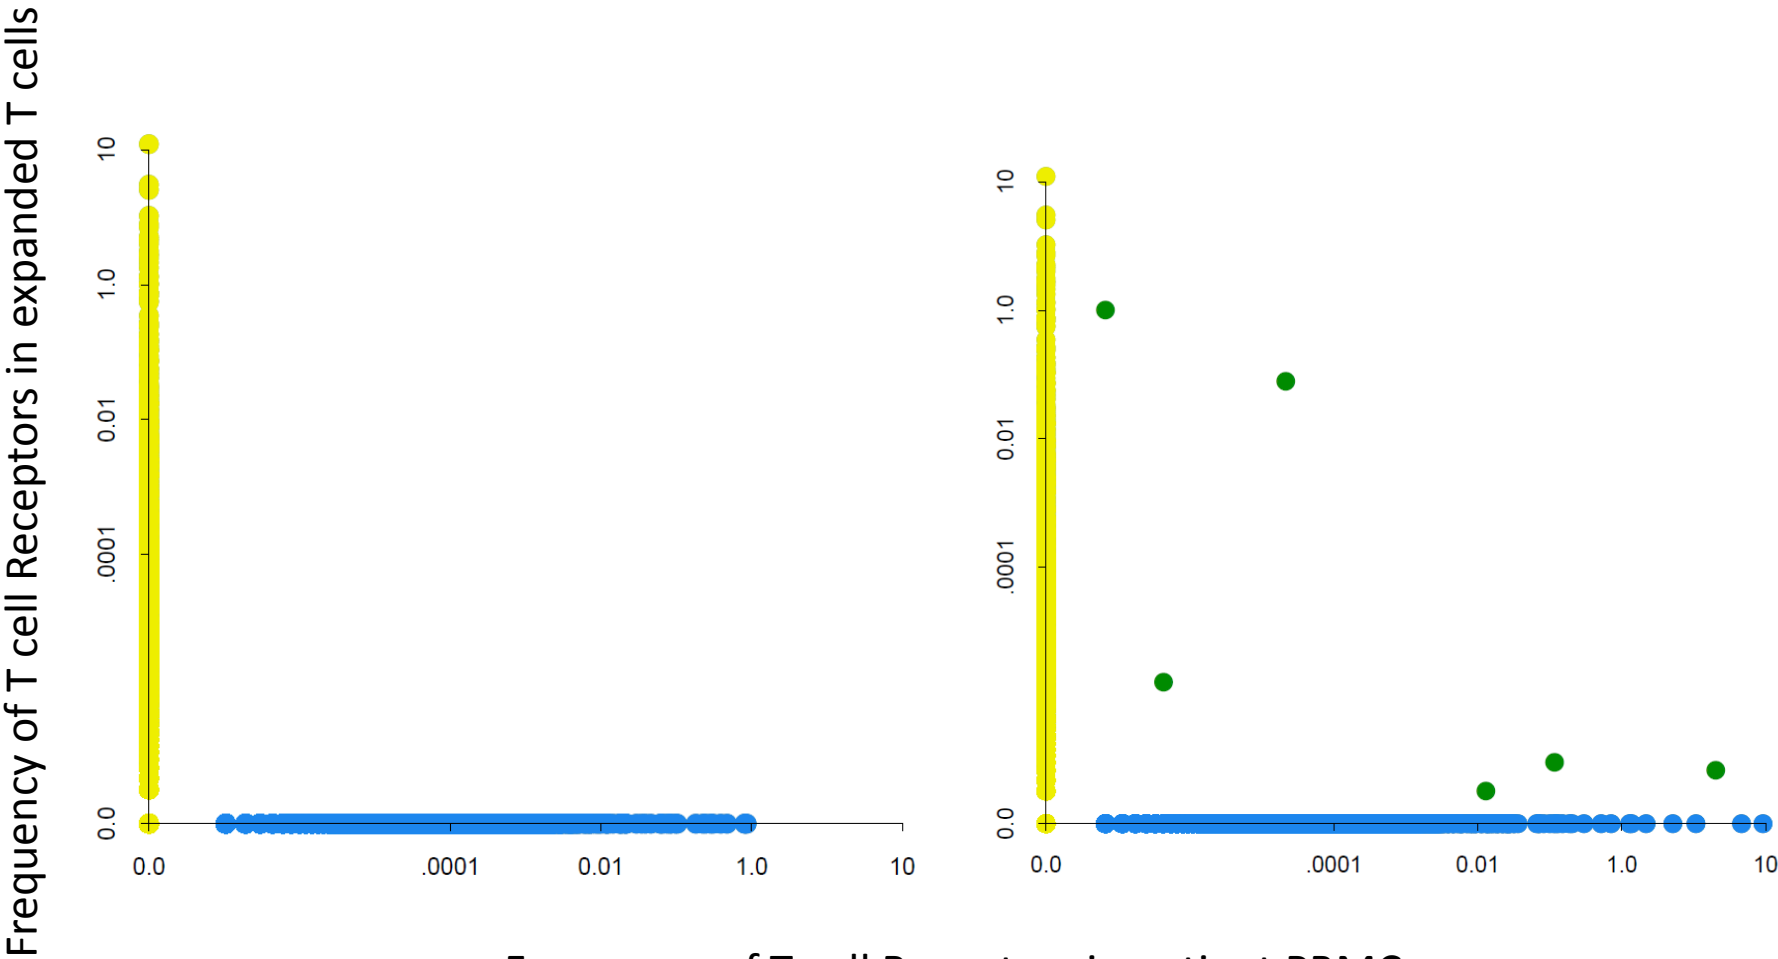

Pre T-cell infusion

Month 6

**Figure S4. Shared T-cell receptors in the CB-derived virus-specific T-cells and Patient P2891 6 months post-T-cell infusion.** TCRs were sequenced from both the expanded T cell product and the patient pre-infusion and 6 months post-T-cell infusion. Blue dots indicate T cell receptors found in patient PBMC samples pre-infusion or at 6 months post-T cell infusion, and yellow dots indicate TCRs found in the expanded T cell product. Green dots indicate TCRs found in both the expanded T cell product and the patient PBMCs.



**Table S1. Epitope recognition by CMV-seronegative donors**

| Donor    | HLA type      | Predicted Epitope(s) | Actual Epitope or peptide | HLA restriction |
|----------|---------------|----------------------|---------------------------|-----------------|
| CMVneg A | A2,24;B15,35  | NLV, QYD             | DANDIYRIF, MLNIPSINV      | HLA-B35, HLA-A2 |
| CMVneg B | A2; B7,40     | NLV, RPH, TPR        | LQTGIHVRV                 | HLA-A2          |
| CMVneg C | A2; B40       | NLV                  | LQTGIHVRV, MLNIPSINV      | HLA-A2          |
| CMVneg D | A3,24;B8,35   | QYD                  | PHETRLQLQTGIHVRVVSQPSL    | Not Identified  |
| CMVneg E | A2;B7,40      | NLV, TPR, RPH        | LQTGIHVRV                 | HLA-A2          |
| CMVneg F | A1,2; B8,51   | YSE, NLV             | LQTGIHVRV, MLNIPSINV      | HLA-A2          |
| CMVneg G | A24; B15,40   | QYD                  | IYVYALPLKMLNIPSINVHH      | Not Identified  |
| CMVneg H | A11,32;B27,37 | ATVQGGQNLK           | IHVRVVSQPSLILVSQYTPDS     | Not Identified  |

CMVneg, CMV-seronegative donor; HLA, Human Leukocyte Antigen; NLV, NLVPMVATV; QYD, QYDPVAALF; TPR, TPRVTGGGAM; YSE, YSEHPTFTSQY; RPH, RPHERNGFTVL

**Table S2. Polyclonality of T cells from CMVnegs and CMVpos donors that recognize typical and atypical epitopes**

| Source   | Epitope      | TCRBV | CDR3                 | TCRBJ | Freq (%) |
|----------|--------------|-------|----------------------|-------|----------|
| CMVpos D | NLV          | 27    | CASSLSAGAPGAEAFF     | 1.1   | 35       |
|          |              | 12.4  | CASSPGSLYYGYTF       | 1.2   | 15       |
|          |              | 6.5   | CASSPITGTGIYGYTF     | 1.2   | 13       |
|          |              | 12.4  | CASSSTNGYTF          | 1.2   | 10       |
|          |              | 6.5   | CASSYATGTAYGYTF      | 1.2   | 8        |
|          |              | 27    | CASSLDRVTGELFF       | 2.2   | 8        |
|          |              | 6.5   | CASSLVTGTGWGYTF      | 1.2   | 5        |
|          |              | 6.5   | CAGSLVTGTGWGYTF      | 1.2   | 3        |
|          |              | 12.4  | CASSSVGEWHF          | 1.5   | 3        |
|          |              | 27    | CASSLDGVTGELFF       | 2.2   | 3        |
| CMVpos C | NLV          | 6.5   | CASRLQTGTIYGYTF      | 1.2   | 91       |
|          |              | 6.5   | CASSFSTGTAGGYTF      | 1.2   | 6        |
|          |              | 6.5   | CASRPQTGTIYGYTF      | 1.2   | 3        |
| CMVPos D | MLN          | 12.3  | CASSFTGIAETQYF       | 2.5   | 21       |
|          |              | 5.1   | CASSLRGPGLYNEQFF     | 2.1   | 19       |
|          |              | 12.3  | CASRSPRAGETQYF       | 2.5   | 16       |
|          |              | 12.4  | CASSFRGDTEAFF        | 1.1   | 5        |
|          |              | 5.1   | CASSLETGSNEQFF       | 2.1   | 5        |
|          |              | 5.6   | CASSWDRRAPSYNEQFF    | 2.1   | 5        |
|          |              | 5.1   | CASSSGGGEQYF         | 2.7   | 5        |
|          |              | 4.3   | CASSQGTSGGLSTDTQYF   | 2.3   | 2        |
|          |              | 5.1   | CASSSGTGDKETQYF      | 2.5   | 2        |
|          |              | 6.1   | CASNKGRYSGANVLTf     | 2.6   | 2        |
|          |              | 6.2   | CASSRGFGLRAGQRNQPQHI | 1.5   | 2        |
| 5.1      | CASSLPGSEAFF | 1.1   | 2                    |       |          |

|          |                    |      |                     |     |    |
|----------|--------------------|------|---------------------|-----|----|
|          |                    | 6.3  | CASSYGTGGQETQYF     | 2.5 | 2  |
|          |                    | 7.9  | CASRGRTQETQYF       | 2.5 | 2  |
|          |                    | 13   | CASSNTGTSGGYEQFF    | 2.1 | 2  |
|          |                    | 12.3 | CASSSYLTAPTDTQYF    | 2.3 | 2  |
|          |                    | 12.4 | CASSFAYGYTF         | 1.2 | 2  |
|          |                    | 30   | CASLKGGGTEAFF       | 1.1 | 2  |
| CMVpos C | MLN                | 28   | CASSLGLNYEQYF       | 2.7 | 28 |
|          |                    | 24.1 | CATHSGNTGELFF       | 2.2 | 18 |
|          |                    | 27   | CASSLSTSGDNEQFF     | 2.1 | 10 |
|          |                    | 6.1  | CASSDFRDRGHNEKLFF   | 1.4 | 8  |
|          |                    | 24.1 | CATFDGNTGELFF       | 2.2 | 8  |
|          |                    | 4.3  | CASSQVGPGRANTEAFF   | 1.1 | 3  |
|          |                    | 2    | CASSAAGGTGSGELFF    | 2.2 | 3  |
|          |                    | 5.6  | CASSRNWVDTEAFF      | 1.1 | 3  |
|          |                    | 5.6  | CASSSLWPELFF        | 2.2 | 3  |
|          |                    | 7.9  | CASSPGDRRYSPLHF     | 1.6 | 3  |
|          |                    | 10.2 | CASSSESGVQGEQYF     | 2.7 | 3  |
|          |                    | 19   | CATENRGYSYNEQFF     | 2.1 | 3  |
|          |                    | 24.1 | CATFSGNTGELFF       | 2.2 | 3  |
|          |                    | 25.1 | CASNYYNEQFF         | 2.1 | 3  |
|          |                    | 28   | CASRREGRVNEKLFF     | 1.4 | 3  |
| 28       | CASSLGLNHEQYF      | 2.7  | 3                   |     |    |
| 28       | CASSSRGLPYEQYF     | 2.7  | 3                   |     |    |
| CMVpos A | MLN                | 12.4 | CASRDRGLGQPQHF      | 1.5 | 50 |
|          |                    | 9    | CASSARTPRPGSSYNEQFF | 2.1 | 16 |
|          |                    | 28   | CASSPPGGSGNTIYF     | 1.3 | 13 |
|          |                    | 28   | CASSFPTGGLWPSDGQYF  | 2.7 | 8  |
|          |                    | 30   | CAWSVASTGLNYEQYF    | 2.7 | 8  |
|          |                    | 5.4  | CASSLAPSTEQYF       | 2.7 | 3  |
|          |                    | 9    | CASSARTLRPGSSYNEQFF | 2.1 | 3  |
| CMVneg H | MLN                | 28   | CASSLPHDSTNYGYTF    | 1.2 | 17 |
|          |                    | 12.3 | CASSFGVNTTEAFF      | 1.1 | 8  |
|          |                    | 5.4  | CASRPKSPLHF         | 1.6 | 6  |
|          |                    | 7.9  | CASSLARRVNPRTDTQYF  | 2.3 | 6  |
|          |                    | 6.5  | CASSLQGRGNQPQHF     | 1.5 | 6  |
|          |                    | 5.6  | CASSPTGTGEAFF       | 1.1 | 6  |
|          |                    | 12.4 | CASSQDRELAFF        | 1.1 | 6  |
|          |                    | 10.3 | CAISEDLSHNSPLHF     | 1.6 | 3  |
|          |                    | 7.9  | CASRAVSTDTQYF       | 2.3 | 3  |
|          |                    | 7.8  | CASSFLRRQTQYF       | 2.5 | 3  |
|          |                    | 7.9  | CASSLAGFGNTIYF      | 1.3 | 3  |
|          |                    | 11.1 | CASSLDLGASTDTQYF    | 2.3 | 3  |
|          |                    | 28   | CASSLGSHDSTNYGYTF   | 1.2 | 3  |
| 27       | CASSLLPPGQGRNQPQHF | 1.5  | 3                   |     |    |

|          |     |      |                     |     |    |
|----------|-----|------|---------------------|-----|----|
|          |     | 28   | CASSLWPKLRYEQYF     | 2.7 | 3  |
|          |     | 12.4 | CASSPPTLEDSGANVLTFF | 2.6 | 3  |
|          |     | 4.1  | CASSQDWAGGLEQFF     | 2.1 | 3  |
|          |     | 4.1  | CASSQFGRNYEQYF      | 2.7 | 3  |
|          |     | 6.2  | CASSQGSAGNQPQHF     | 1.5 | 3  |
|          |     | 4.3  | CASSQVLAGEGTDQYF    | 2.3 | 3  |
|          |     | 15   | CATSGRTGELFF        | 2.2 | 3  |
|          |     | 15   | CATSPTANTEAFF       | 1.1 | 3  |
|          |     | 30   | CAWGRNTEAFF         | 1.1 | 3  |
|          |     | 30   | CAWTVGNTEAFF        | 1.1 | 3  |
| CMVneg A | MLN | 5.1  | CASSLAVQSDEQYF      | 2.7 | 76 |
|          |     | 5.1  | CASSPSGYNEQFF       | 2.1 | 7  |
|          |     | 9    | CASSPSGGVGTGELFF    | 2.2 | 7  |
|          |     | 5.1  | CASSLTVQSDEQYF      | 2.7 | 2  |
|          |     | 7.9  | CASSGRDNYNEQFF      | 2.1 | 2  |
|          |     | 18   | CASSTRDRGSEQFF      | 2.1 | 2  |
|          |     | 20.1 | CSARDRDRGYEQYF      | 2.7 | 2  |

CMVpos, CMV-seropositive donor; CMVneg, CMV-seronegative donor; NLV, NLVPMVATV; MLN, MLNIPSINV

**Table S3. Precursor frequencies of TCRs recognizing NLV and MLN from CB**

| Peptide | CDR3 Sequence  | CB #1 (%)             | CB #2 (%)             | CB #3 (%)             | CB#4 (%)              | CB #5 (%)             | Total frequency (%)   |
|---------|----------------|-----------------------|-----------------------|-----------------------|-----------------------|-----------------------|-----------------------|
| NLV     | CASSYNSAGYNEQF | 4.12X10 <sup>-6</sup> |                       |                       |                       |                       | 4.12x10 <sup>-6</sup> |
| MLN     | CASSFGVNTEAFF  |                       |                       | 1.89x10 <sup>-5</sup> |                       |                       | 1.89x10 <sup>-5</sup> |
| MLN     | CASSFRGDTEAFF  | 2.78X10 <sup>-5</sup> | 1.33X10 <sup>-6</sup> | 1.61X10 <sup>-5</sup> |                       |                       | 4.52X10 <sup>-5</sup> |
| MLN     | CAWGRNTEAFF    |                       |                       | 7.32X10 <sup>-5</sup> |                       |                       | 7.32X10 <sup>-5</sup> |
| MLN     | CSARDRDRGYEQYF | 4.12X10 <sup>-6</sup> |                       |                       |                       |                       | 4.12X10 <sup>-6</sup> |
| LQT     | CASSITDTQY     |                       |                       | 1.42X10 <sup>-6</sup> | 7.12X10 <sup>-5</sup> | 3.14X10 <sup>-5</sup> | 1.04X10 <sup>-4</sup> |

CDR3, Complimentarity determining region; CB, Cord Blood Unit

**Table S4.** Inhibition of CMV dissemination by T-cells recognizing typical and atypical epitopes

| Condition                                           | CMV CPE? |
|-----------------------------------------------------|----------|
| CMV supernatant + fibroblasts                       | Yes      |
| CMV lysate + fibroblasts                            | Yes      |
| CMV + fibroblasts + atypical (MLN)-specific T cells | No       |
| CMV + fibroblasts + typical (NLV)-specific T cells  | No       |

T cells were expanded against either typical (NLV) or atypical epitopes from a CMV-seropositive donor. These T cells were then co-cultured with CMV-infected fibroblasts for three days, after which the supernatant or lysate was added to new fibroblasts to measure the CMV CPE.

#### Source Data

#### Figure 1A.

|             | T cells alone | Irrelevant peptide | CMVpp65     |
|-------------|---------------|--------------------|-------------|
| <b>Neg1</b> | <b>22.8</b>   | <b>26.4</b>        | <b>27.6</b> |
| <b>Neg2</b> | <b>4</b>      | <b>11.9</b>        | <b>39.3</b> |
| <b>Neg3</b> | <b>34.4</b>   | <b>37.3</b>        | <b>42.2</b> |
| <b>Neg4</b> | <b>25</b>     | <b>26.2</b>        | <b>32.3</b> |
| <b>Neg5</b> | <b>8.3</b>    | <b>7.4</b>         | <b>13.6</b> |
| <b>Neg6</b> | <b>31.3</b>   | <b>49.7</b>        | <b>33.3</b> |
| <b>Net7</b> | <b>4</b>      | <b>5.7</b>         | <b>6</b>    |
| <b>Neg8</b> | <b>11.8</b>   | <b>9.4</b>         | <b>13.1</b> |
| <b>Neg9</b> | <b>66</b>     | <b>83.5</b>        | <b>122</b>  |

**Figure 1B.**

|              | T cells alone | Irrelevant peptide | CMVpp65       |
|--------------|---------------|--------------------|---------------|
| <b>Neg1</b>  | <b>5</b>      | <b>3.3</b>         | <b>464.33</b> |
| <b>Neg2</b>  | <b>21.33</b>  | <b>19.33</b>       | <b>71</b>     |
| <b>Neg3</b>  | <b>7.33</b>   | <b>10</b>          | <b>329.67</b> |
| <b>Neg4</b>  | <b>7.33</b>   | <b>4.66</b>        | <b>172.33</b> |
| <b>Neg5</b>  | <b>73.67</b>  | <b>96</b>          | <b>102</b>    |
| <b>Neg6</b>  | <b>1.33</b>   | <b>0.67</b>        | <b>0.67</b>   |
| <b>Neg8</b>  | <b>1.5</b>    | <b>4.33</b>        | <b>38</b>     |
| <b>Neg9</b>  | <b>11</b>     | <b>16.33</b>       | <b>18.33</b>  |
| <b>Neg10</b> | <b>2</b>      | <b>3</b>           | <b>611</b>    |
| <b>Neg11</b> | <b>0.33</b>   | <b>0.33</b>        | <b>26.33</b>  |

**Figure 1C**

|              | CD3/CD8      | CD3/CD4      | CD16/CD56   | CD45RO+/CD62L+ | CD45RO+/CD62L- |
|--------------|--------------|--------------|-------------|----------------|----------------|
| <b>Neg2</b>  | <b>97.86</b> | <b>11.25</b> | <b>3.06</b> | <b>10.97</b>   | <b>59.23</b>   |
| <b>Neg3</b>  | <b>67.01</b> | <b>34.49</b> | <b>2.35</b> | <b>14.97</b>   | <b>84.23</b>   |
| <b>Neg1</b>  | <b>88.67</b> | <b>14.91</b> | <b>5.86</b> | <b>29.28</b>   | <b>7.88</b>    |
| <b>Neg9</b>  | <b>43.41</b> | <b>67.79</b> | <b>2.52</b> | <b>71.42</b>   | <b>26.67</b>   |
| <b>Neg4</b>  | <b>57.78</b> | <b>36.68</b> | <b>6.28</b> | <b>34.37</b>   | <b>4.65</b>    |
| <b>Neg8</b>  | <b>92.56</b> | <b>4.74</b>  | <b>0.54</b> | <b>89.55</b>   | <b>6.94</b>    |
| <b>Neg10</b> | <b>69.1</b>  | <b>32.15</b> | <b>0.52</b> | <b>72.65</b>   | <b>7.2</b>     |
| <b>Neg11</b> | <b>7.54</b>  | <b>94.98</b> | <b>0.71</b> | <b>49.93</b>   | <b>72.95</b>   |

**Figure 1E**

|                  | Cells alone  | IE-1        | pp65         | LCL         |
|------------------|--------------|-------------|--------------|-------------|
| <b>Naïve</b>     | <b>2</b>     | <b>3</b>    | <b>611</b>   | <b>0</b>    |
| <b>Non-naive</b> | <b>12.67</b> | <b>8.33</b> | <b>12.67</b> | <b>98.5</b> |

**Figure 2A**

|                | 1    | 2     | 3    | 4     | 5    | 6    | 7    | 8    | 9    | 10   | 11    | 12   | 13   | 14   | 15    | 16  | 17   | 18   | 19   | 20   | 21/22 |
|----------------|------|-------|------|-------|------|------|------|------|------|------|-------|------|------|------|-------|-----|------|------|------|------|-------|
| <b>CMVposA</b> | 1.05 | 27.26 | 5.38 | 1.277 | 1.55 | 1.78 | 4.78 | 9.49 | 7.83 | 0.78 | 2.83  | 2.39 | 1.11 | 1.78 | 0.44  | 0.5 | 1    | 7.72 | 0.56 | 0.39 | 20.1  |
| <b>CMVposB</b> | 0    | 54.36 | 5.52 | 0     | 0    | 0    | 0.29 | 0.29 | 0    | 0    | 0     | 0    | 0    | 0    | 0     | 0   | 0    | 0    | 0    | 0    | 39.53 |
| <b>CMVposC</b> | 1.47 | 8.1   | 2.04 | 0.45  | 4.85 | 7.86 | 5.7  | 1.43 | 0.86 | 6.6  | 17.32 | 0.98 | 0.33 | 3.5  | 18.17 | 5.9 | 1.92 | 2.04 | 0.45 | 0.16 | 9.86  |

**Figure 2B**

|             | 1    | 2    | 3    | 4    | 5    | 6    | 7     | 8     | 9     | 10   | 11   | 12    | 13    | 14   | 15   | 16   | 17   | 18    | 19   | 20   | 21/22 |
|-------------|------|------|------|------|------|------|-------|-------|-------|------|------|-------|-------|------|------|------|------|-------|------|------|-------|
| <b>Neg1</b> | 2.83 | 2.88 | 2.63 | 3.23 | 3.28 | 6.95 | 10.38 | 18.52 | 3.48  | 3.03 | 2.14 | 1.54  | 2.23  | 2.23 | 1.99 | 2.73 | 3.03 | 3.23  | 2.88 | 2.88 | 18.52 |
| <b>Neg2</b> | 0.87 | 0.55 | 0.46 | 0.73 | 0.69 | 0.46 | 25.38 | 15.1  | 20.16 | 0.41 | 0.5  | 0.6   | 30.92 | 0.55 | 0.18 | 0.41 | 0.32 | 0.5   | 0.46 | 0.46 | 0.32  |
| <b>Neg3</b> | 6.8  | 9.74 | 8.53 | 8.16 | 7.19 | 7.53 | 7.91  | 8.71  | 7.41  | 7.91 | 8.52 | 8.08  | 0.58  | 0.9  | 0.68 | 0.4  | 1.15 | 0.5   | 0.74 | 1.55 | 0.93  |
| <b>Neg8</b> | 0    | 0    | 2.04 | 4.08 | 2.04 | 0    | 4.08  | 18.37 | 0     | 4.08 | 2.04 | 16.33 | 0     | 0    | 2.04 | 0    | 4.08 | 28.57 | 0    | 2.04 | 18.2  |

**Figure 3A**

|                | Cells alone | CMVpp65    | NLV          | LQT         | MLN      |
|----------------|-------------|------------|--------------|-------------|----------|
| <b>Donor 1</b> | <b>10</b>   | <b>756</b> | <b>661.5</b> | <b>14.5</b> | <b>2</b> |

|                |            |              |              |              |              |
|----------------|------------|--------------|--------------|--------------|--------------|
| <b>Donor 2</b> | <b>5</b>   | <b>708.5</b> | <b>823</b>   | <b>1.5</b>   | <b>1</b>     |
| <b>Donor 3</b> | <b>208</b> | <b>382.5</b> | <b>339</b>   | <b>327</b>   | <b>458.5</b> |
| <b>Donor 4</b> | <b>33</b>  | <b>289</b>   | <b>372</b>   | <b>76.5</b>  | <b>48</b>    |
| <b>Donor 5</b> | <b>82</b>  | <b>577</b>   | <b>912.5</b> | <b>130.5</b> | <b>159</b>   |

**Figure 3C**

|          |                  |              |
|----------|------------------|--------------|
|          | <b>CTL alone</b> | <b>LQT</b>   |
| <b>1</b> | <b>39</b>        | <b>310</b>   |
| <b>2</b> | <b>4</b>         | <b>508</b>   |
| <b>3</b> | <b>22.5</b>      | <b>48.67</b> |

**Figure 3D**

|          |                  |               |
|----------|------------------|---------------|
|          | <b>CTL alone</b> | <b>MLN</b>    |
| <b>1</b> | <b>5</b>         | <b>276</b>    |
| <b>2</b> | <b>28.5</b>      | <b>195.83</b> |
| <b>3</b> | <b>11</b>        | <b>526.5</b>  |

**Figure 3E**

|                 |                  |                   |              |                    |
|-----------------|------------------|-------------------|--------------|--------------------|
|                 | <b>CTL alone</b> | <b>Irrelevant</b> | <b>NLV</b>   | <b>Pos Control</b> |
| <b>CB1</b>      | <b>26.5</b>      | <b>23.667</b>     | <b>20.33</b> | <b>183</b>         |
| <b>CB2</b>      | <b>8</b>         | <b>7</b>          | <b>6.33</b>  | <b>182</b>         |
| <b>CB3</b>      | <b>12</b>        | <b>20</b>         | <b>4</b>     | <b>16</b>          |
| <b>CMVneg 1</b> | <b>0</b>         | <b>1.667</b>      | <b>2.667</b> | <b>425</b>         |
| <b>CMVneg 2</b> | <b>2.5</b>       | <b>2</b>          | <b>0.33</b>  | <b>436</b>         |
| <b>CMVneg 3</b> | <b>0</b>         | <b>0.667</b>      | <b>0.667</b> | <b>400</b>         |
| <b>CB4</b>      | <b>0.5</b>       | <b>0.5</b>        | <b>2</b>     | <b>568</b>         |
| <b>CB5</b>      | <b>23</b>        | <b>22</b>         | <b>19</b>    | <b>945</b>         |

**Figure 3F**

|                  |                   |                   |               |
|------------------|-------------------|-------------------|---------------|
| <b>ng/ml</b>     | <b>CMVpos NLV</b> | <b>CMVpos MLN</b> | <b>CB MLN</b> |
| <b>100</b>       | <b>875.33</b>     | <b>224.33</b>     | <b>276</b>    |
| <b>10</b>        | <b>888.33</b>     | <b>199</b>        | <b>265.53</b> |
| <b>1</b>         | <b>512.33</b>     | <b>149.33</b>     | <b>241.67</b> |
| <b>0.1</b>       | <b>254</b>        | <b>45</b>         | <b>123.33</b> |
| <b>0.01</b>      | <b>38.67</b>      | <b>24.67</b>      | <b>57.67</b>  |
| <b>0.001</b>     | <b>7.67</b>       | <b>26.33</b>      | <b>42.33</b>  |
| <b>0.0001</b>    | <b>6.33</b>       | <b>33.33</b>      | <b>40.33</b>  |
| <b>CTL alone</b> | <b>5.5</b>        | <b>28.5</b>       | <b>44.5</b>   |

**Figure 4A**

|               |                    |                |
|---------------|--------------------|----------------|
|               | <b>Cells alone</b> | <b>CMVpp65</b> |
| <b>CMVpos</b> | <b>1.67</b>        | <b>248</b>     |
| <b>CMVneg</b> | <b>9</b>           | <b>120.33</b>  |
| <b>CB</b>     | <b>4</b>           | <b>58</b>      |



# Gating Strategy & Isotype Control (Figure 1C)

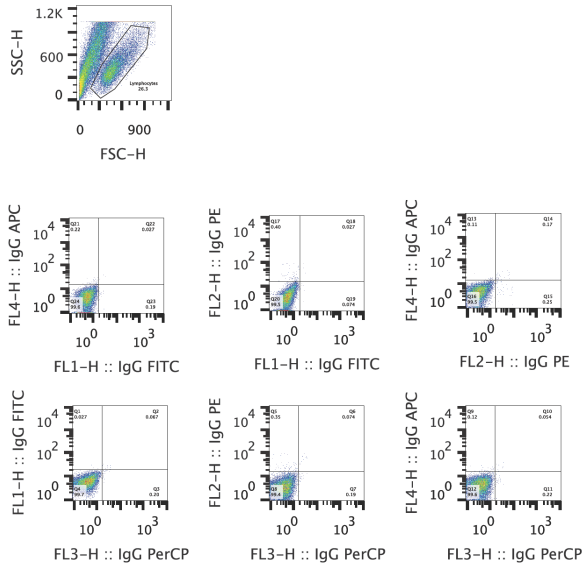

## Representative Flow Graph

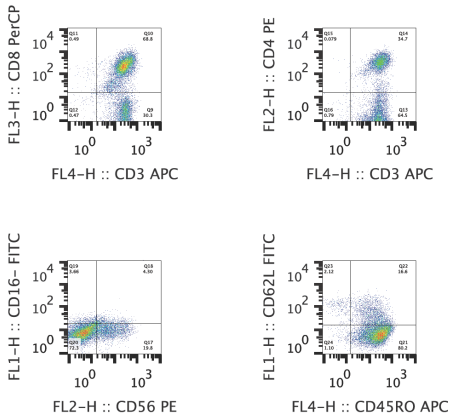

## Data Point Location of Representative Flow Above

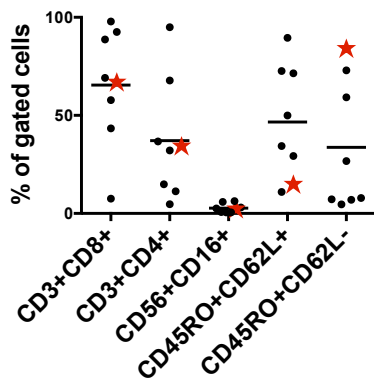



# Gating Strategy & Isotype Control (Figure 3C)

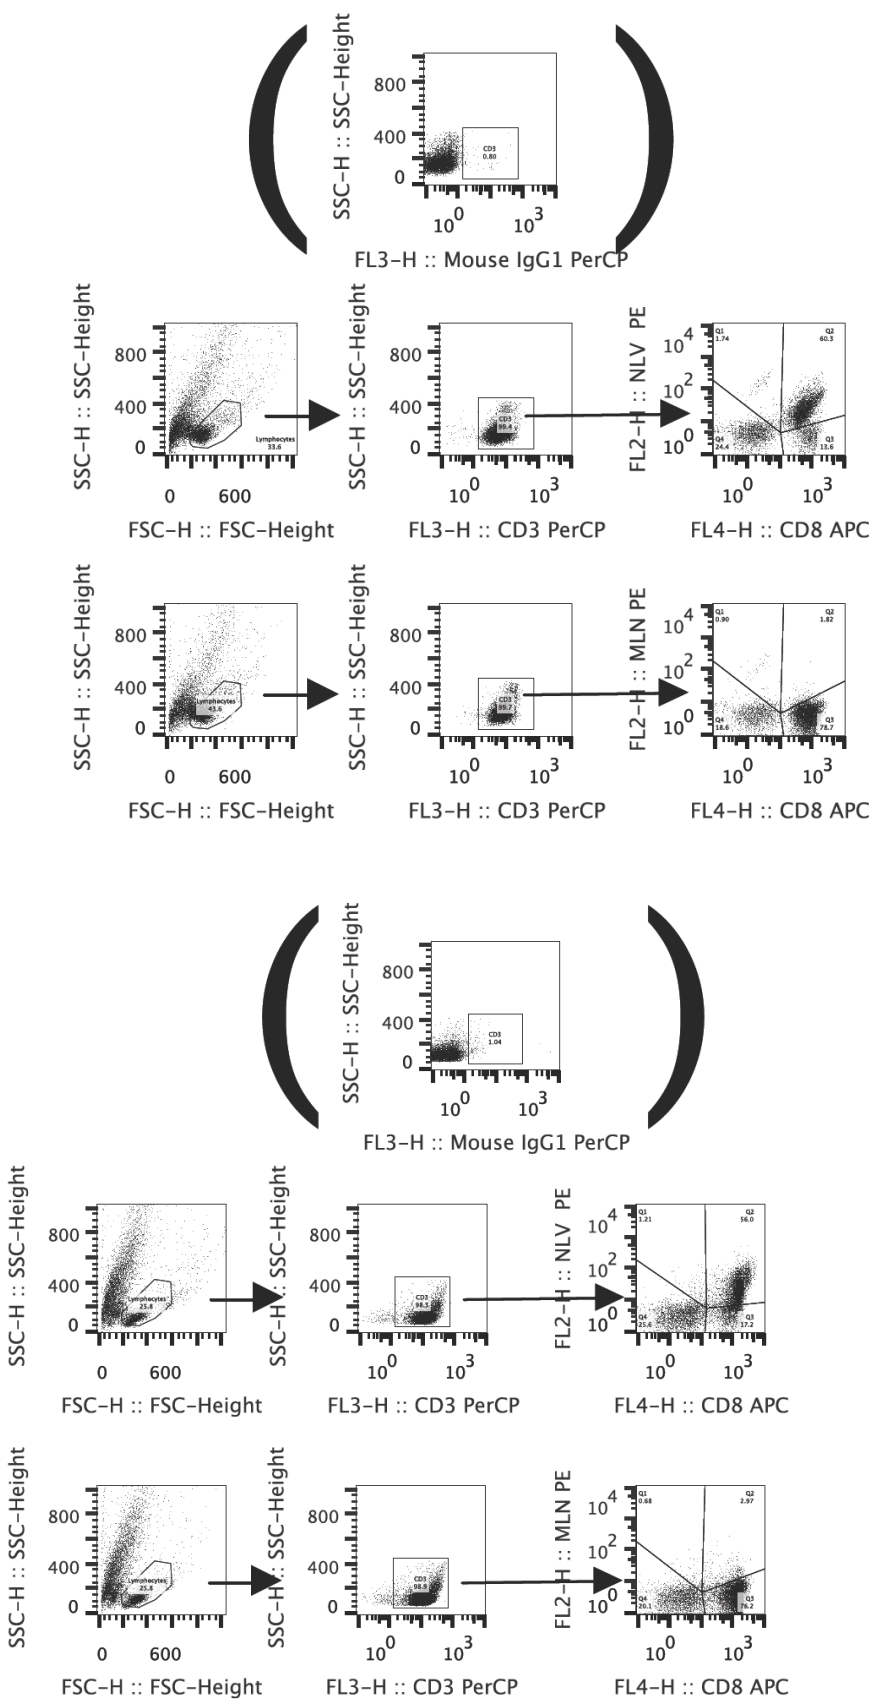

# Gating Strategy & Isotype Controls (Fig 4B)

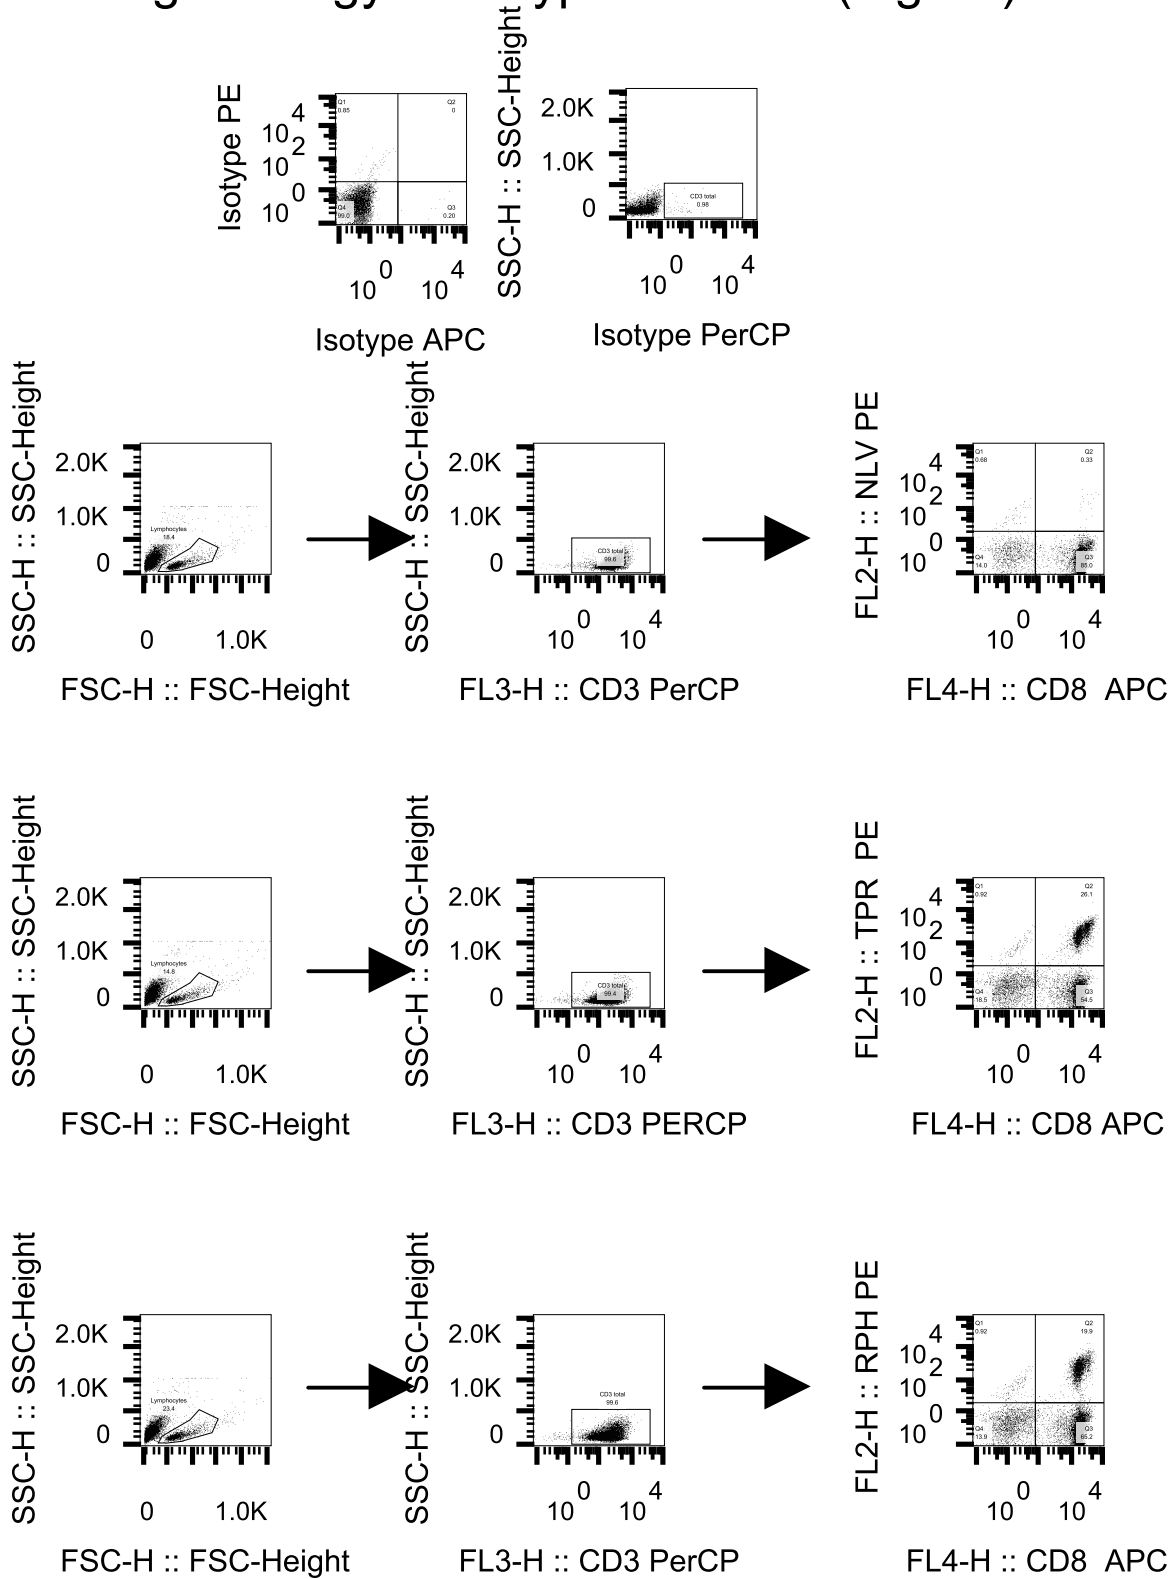

# Gating Strategy & Isotype Controls (Fig 4C)

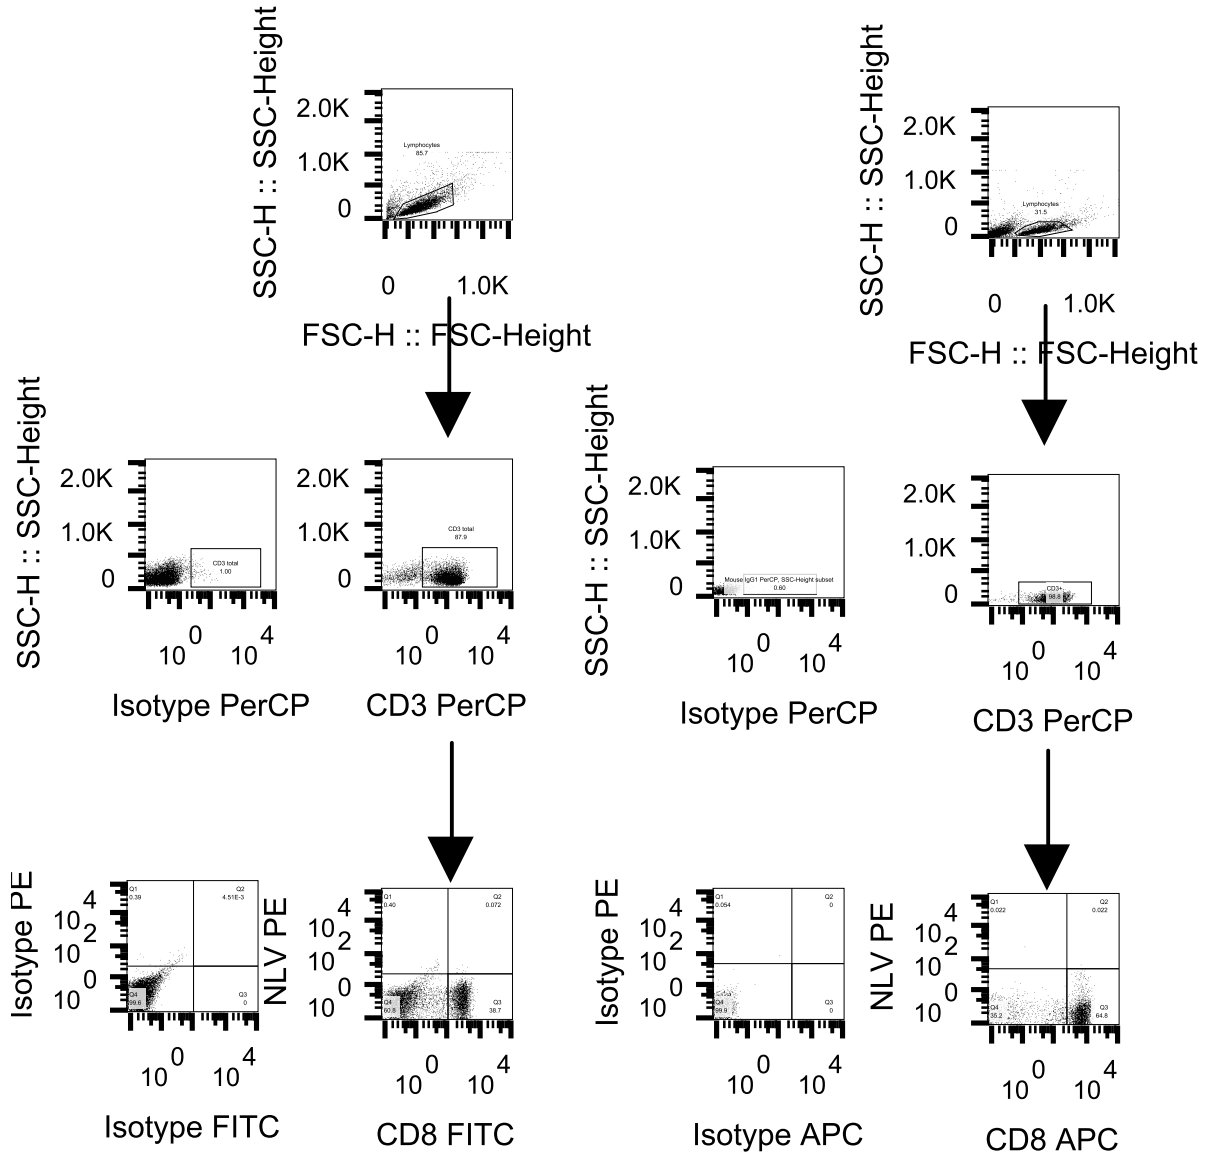

# Gating Strategy & Isotype Controls (Fig 4D)

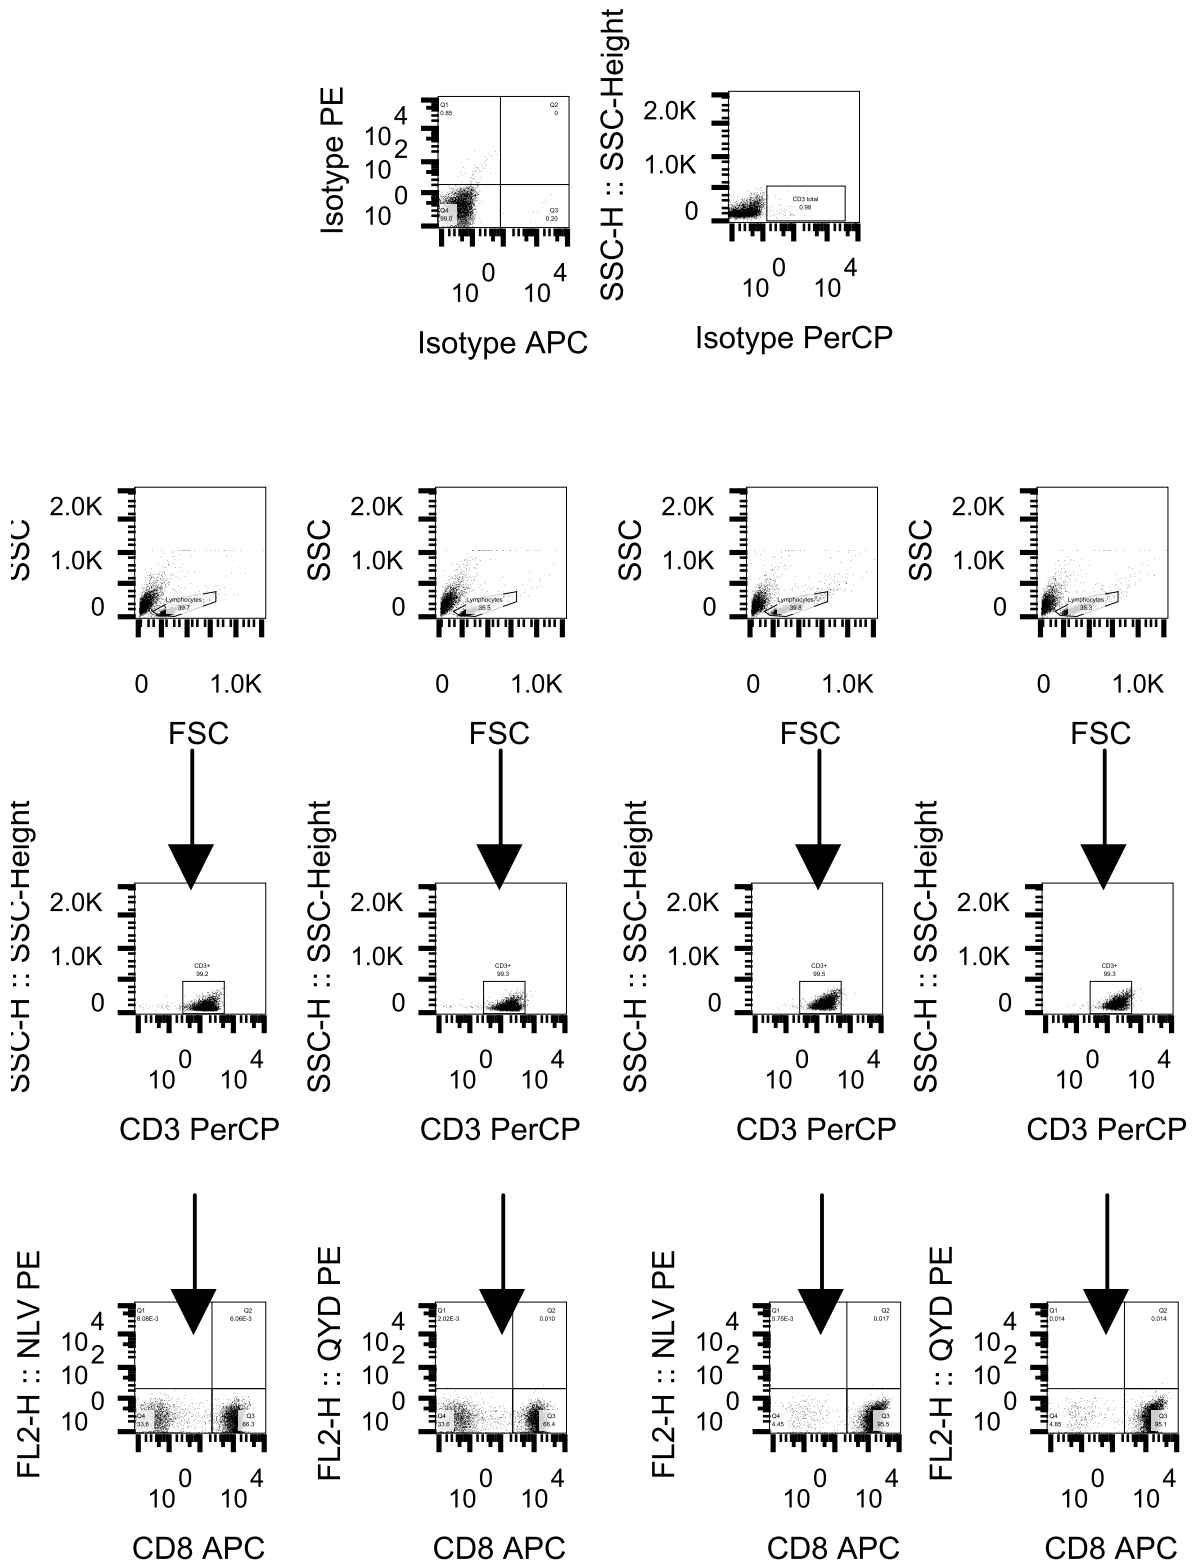

Supplement: NIHMS700975-supplement-1.pdf [file NIHMS700975-supplement-1.pdf]
